# Supplementary material for: KRAS(G12D) can be targeted by potent inhibitors via formation of salt bridge
Source: PubMed Central journal article supplement (PMC8786924; doi:10.1038/s41421-021-00368-w), 2022-01-25
Supplement: 41421_2021_368_MOESM1_ESM.pdf [file 41421_2021_368_MOESM1_ESM.pdf]

1 **KRAS(G12D) can be targeted by potent inhibitors via formation of salt bridge**

2  
3 Zhongwei Mao<sup>1</sup>, Hongying Xiao<sup>1,2</sup>, Panpan Shen<sup>3</sup>, Yu Yang<sup>3</sup>, Jing Xue<sup>1</sup>, Yunyun Yang<sup>1</sup>, Yanguo Shang<sup>1</sup>, Lilan Zhang<sup>3</sup>,  
4 Xin Li<sup>1,2</sup>, Yuying Zhang<sup>4</sup>, Yanan Du<sup>4</sup>, Chun-Chi Chen<sup>3</sup>, Rey-Ting Guo<sup>3</sup>, Yonghui Zhang<sup>1</sup>

5  
6 <sup>1</sup>School of Pharmaceutical Science, Tsinghua-Peking Center for Life Sciences, Tsinghua University; Beijing  
7 Advanced Innovation Center for Human Brain Protection, Beijing, China.

8 <sup>2</sup>Joint Graduate Program of Peking-Tsinghua-NIBS, School of Life Sciences, Tsinghua University, Beijing, China.

9 <sup>3</sup>State Key Laboratory of Bio-catalysis and Enzyme Engineering, Hubei Collaborative Innovation Center for Green  
10 Transformation of Bio-Resources, School of Life Sciences, Hubei University, Wuhan, China.

11 <sup>4</sup>Department of Biomedical Engineering, School of Medicine, Tsinghua-Peking Center for Life Science, Tsinghua  
12 University, Beijing, China.

13 These authors contributed equally: Zhongwei Mao, Hongying Xiao, Panpan Shen, Yu Yang.

14  
15 Correspondence: Rey-Ting Guo (guoreyting@hubu.edu.cn) or Yonghui Zhang (zhangyonghui@tsinghua.edu.cn)

**Table S1 Crystallization data collection and refinement statistics**

|                                                 | KRAS G12D<br>TH-Z816         | KRAS G12D<br>TH-Z827         | KRAS G12D<br>TH-Z835         |
|-------------------------------------------------|------------------------------|------------------------------|------------------------------|
| PDB code                                        | 7EW9                         | 7EWA                         | 7EWB                         |
| <b>Data collection</b>                          |                              |                              |                              |
| Space group                                     | <i>P</i> 12 <sub>1</sub> 1   | <i>P</i> 12 <sub>1</sub> 1   | <i>P</i> 12 <sub>1</sub> 1   |
| Cell dimensions                                 |                              |                              |                              |
| a, b, c (Å)                                     | 47.0, 103.4, 56.3            | 46.7, 102.8, 56.4            | 46.6, 102.5, 56.1            |
| α, β, γ (°)                                     | 90, 106.4, 90                | 90, 107.1, 90                | 90, 106.9, 90                |
| Resolution (Å)                                  | 50.0 – 2.13<br>(2.16 – 2.13) | 50.0 – 2.25<br>(2.28 – 2.25) | 50.0 – 1.99<br>(2.02 – 1.99) |
| No. of observed reflections                     | 28858 (1177)                 | 24193 (946)                  | 34543 (1505)                 |
| Redundancy                                      | 7.0 (4.0)                    | 9.1 (6.7)                    | 6.1 (3.5)                    |
| Completeness (%)                                | 99.9 (98.5)                  | 100.0 (100.0)                | 99.9 (100.0)                 |
| I/sigma (I)                                     | 14.1 (2.4)                   | 12.6 (3.3)                   | 10.0 (2.1)                   |
| <i>R</i> <sub>merge</sub> (%) <sup>b</sup>      | 7.2 (42.0)                   | 8.4 (39.8)                   | 8.8 (39.5)                   |
| CC <sub>1/2</sub>                               | 1.0 (0.81)                   | 1.0 (0.95)                   | 1.0 (0.88)                   |
| <b>Refinement<sup>c</sup></b>                   |                              |                              |                              |
| <i>R</i> <sub>work</sub>                        | 20.1                         | 20.3                         | 19.5                         |
| <i>R</i> <sub>free</sub>                        | 25.7                         | 25.8                         | 24.6                         |
| r.m.s.d bonds (Å)                               | 0.008                        | 0.008                        | 0.007                        |
| r.m.s.d angles (°)                              | 1.098                        | 1.079                        | 1.105                        |
| <b>Ramachandran statistics</b>                  |                              |                              |                              |
| Preferred (%)                                   | 96.8                         | 97.3                         | 98.0                         |
| Allowed (%)                                     | 3.0                          | 2.7                          | 2.0                          |
| Outliers (%)                                    | 0.2                          | 0                            | 0                            |
| <b>Average B-factor (Å<sup>2</sup>) / Atoms</b> |                              |                              |                              |
| Protein                                         | 39.1 / 4015                  | 43.6 / 3902                  | 31.1 / 4053                  |
| Mg                                              | 36.5 / 3                     | 42.0 / 3                     | 30.8 / 3                     |
| GMPPNP or GDP                                   | 31.8 / 84                    | 37.9 / 92                    | 26.7 / 92                    |
| Inhibitor                                       | 40.1 / 72                    | 43.4 / 74                    | 32.4 / 111                   |
| Solvent                                         | 41.3 / 276                   | 43.5 / 169                   | 34.4 / 317                   |

<sup>a</sup> Values in parentheses are for the highest resolution shell.

<sup>b</sup>  $R_{\text{merge}} = \frac{\sum_{hkl} \sum_i |I_i(hkl) - \langle I(hkl) \rangle|}{\sum_{hkl} \sum_i I_i(hkl)}$ , where the sum is the overall *i* measured reflections with equivalent miller indices *hkl*;  $\langle I(hkl) \rangle$  is the averaged intensity of these *i* reflections, and the grand sum is the overall measured reflections in the data set.

<sup>c</sup> All positive reflections were used in the refinement.

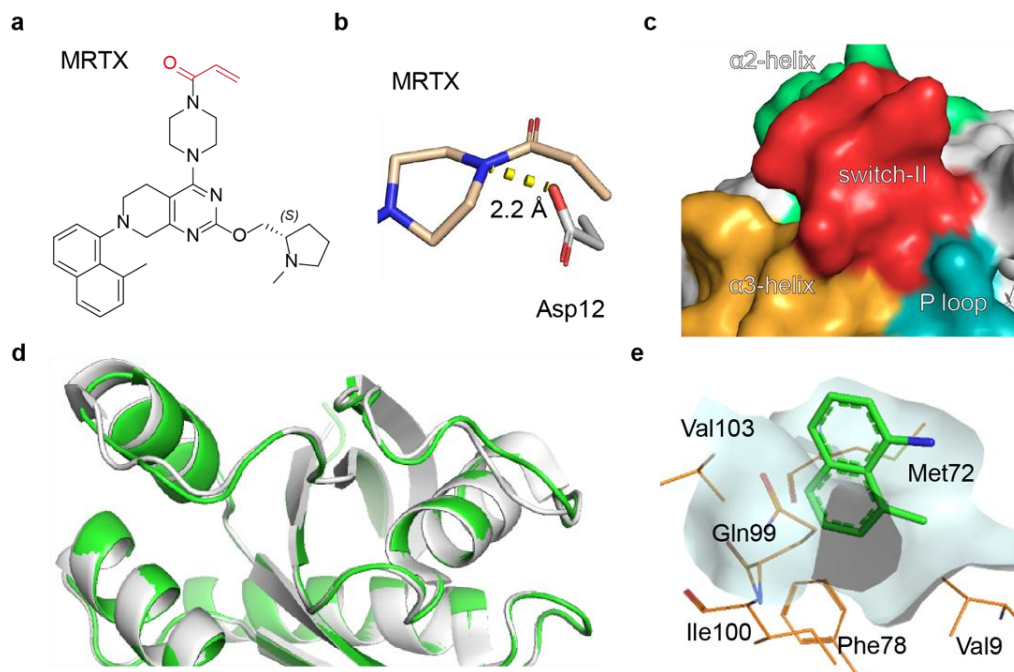

**Fig. S1: Additional insights into compound binding and the induced-fit pocket of KRAS(G12D).** **a** Chemical structure of the previously reported acryloyl-moiety-containing KRAS(G12C) inhibitor MRTX (the acryloyl moiety is highlighted in red). **b** Docking pose showing the 2.2 Å distance between the N atom of piperazine moiety (PDB ID: 6USX) and the O atom of Asp12 (PDB ID 4EPR). **c** The inhibitor-free KRAS(G12D) structure (PDB ID: 4EPR). Secondary structures, including  $\alpha$ 2-helix (green), switch II (red),  $\alpha$ 3-helix (orange) and P loop (teal), are shown as a surface diagram. **d** Alignment of TH-Z816-bound KRAS(G12D) (green, PDB ID: 7EW9) and MRTX-bound KRAS(G12C) (white, PDB ID: 6USX), shown as secondary structures. **e** There is a hydrophobic pocket around the naphthyl moiety of TH-Z816, comprising Val9, Met72, Phe78, Gln99, Ile100, and Val103.

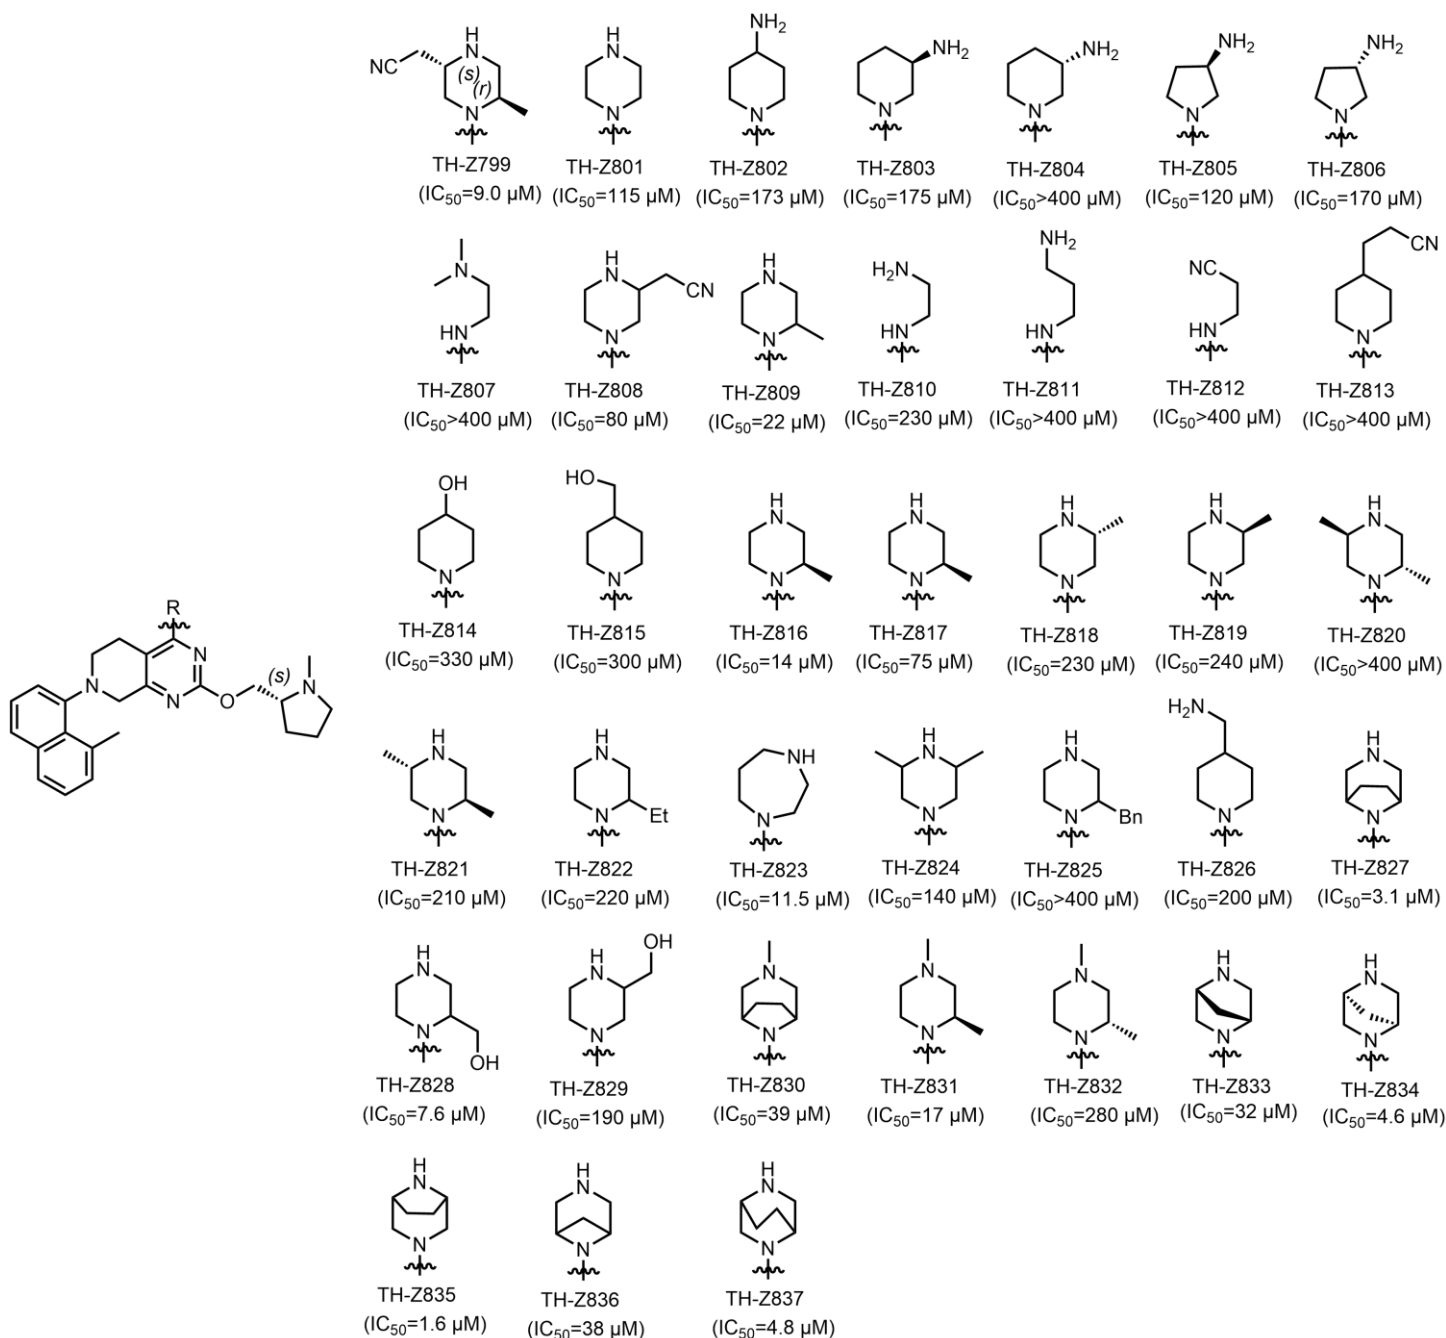

49 **Fig. S2: Chemical structures of KRAS(G12D) inhibitors with various R substituents and their inhibitory**  
 50 **activities tested by SOS-catalyzed nucleotide exchange assay.**

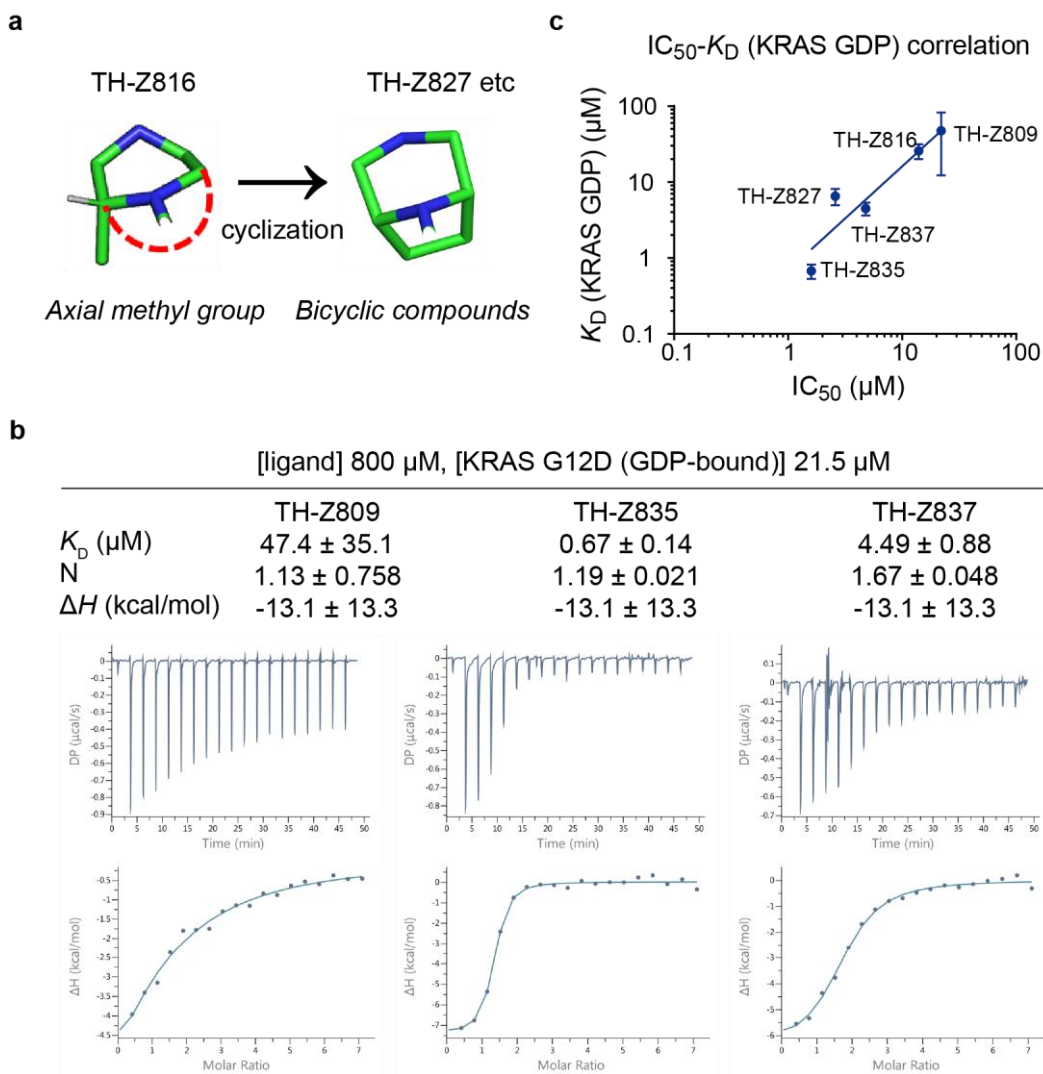

51  
 52 **Fig. S3: Structural analysis of KRAS(G12D) bound to TH-Z816.** **a** The axial position of the methyl group of TH-  
 53 Z816 suggests cyclization as a feasible strategy for inhibitor design. **b** ITC assays of the indicated compounds (800  
 54  $\mu\text{M}$ ) and GDP-bound KRAS(G12D) (21.5  $\mu\text{M}$ ). **c** ITC  $K_D$  (GDP-bound KRAS(G12D)) and  $\text{IC}_{50}$  values of the indicated  
 55 compounds, fit based on linear correlation (blue line). The structures of all compounds are shown in Supplementary  
 56 **Fig. S2.**

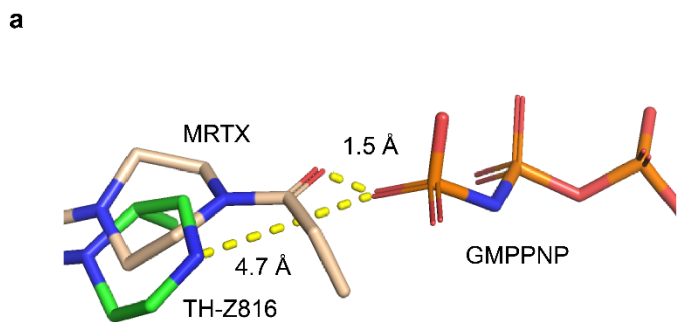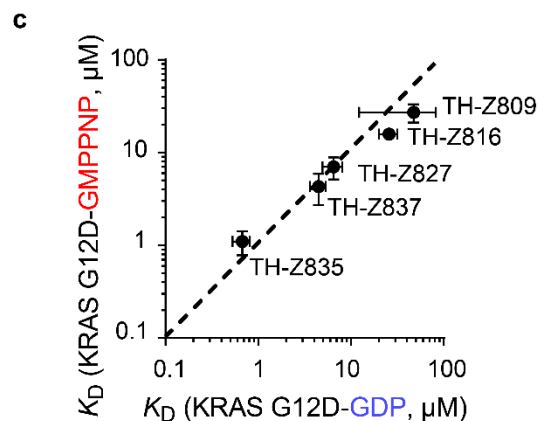

**b**

| [ligand] 800 $\mu\text{M}$<br>[KRAS G12D (GMPPNP-bound)] | TH-Z809           | TH-Z816           | TH-Z827           | TH-Z835           | TH-Z837           |
|----------------------------------------------------------|-------------------|-------------------|-------------------|-------------------|-------------------|
| $K_D$ ( $\mu\text{M}$ )                                  | 29 $\mu\text{M}$  | 29 $\mu\text{M}$  | 47 $\mu\text{M}$  | 47 $\mu\text{M}$  | 47 $\mu\text{M}$  |
| N                                                        | 27.1 $\pm$ 6.03   | 15.8 $\pm$ 1.36   | 7.01 $\pm$ 1.88   | 1.10 $\pm$ 0.319  | 4.31 $\pm$ 1.60   |
| $\Delta H$ (kcal/mol)                                    | 1.00              | 0.73 $\pm$ 0.032  | 1.09 $\pm$ 0.04   | 1.01 $\pm$ 0.022  | 1.22 $\pm$ 0.052  |
| $-\Delta S$ (kcal/mol)                                   | -7.82 $\pm$ 0.995 | -11.0 $\pm$ 0.749 | -5.96 $\pm$ 0.438 | -6.06 $\pm$ 0.227 | -6.06 $\pm$ 0.486 |
| $\Delta G$ (kcal/mol)                                    | 1.59              | 4.46              | -1.06             | -2.07             | -1.27             |
|                                                          | -6.23             | -6.55             | -7.03             | -8.13             | -7.32             |

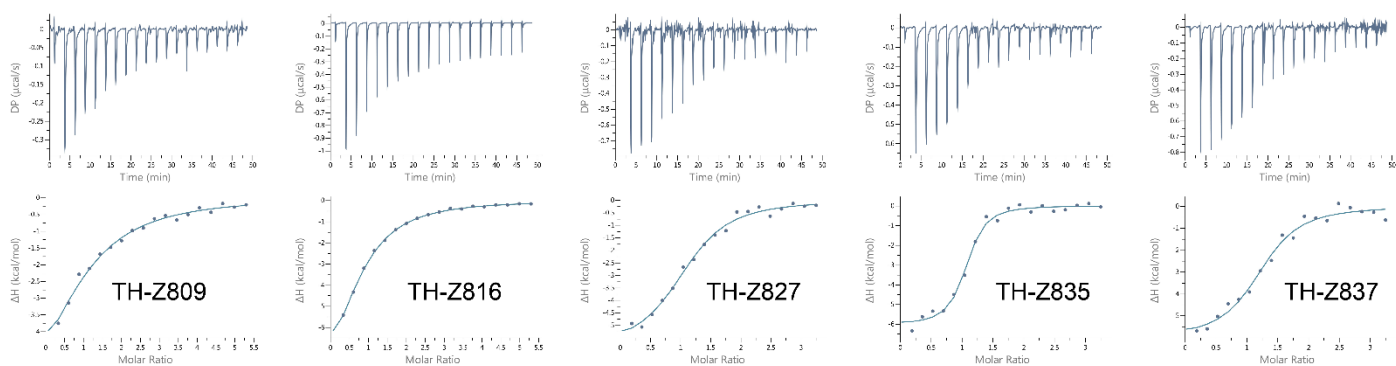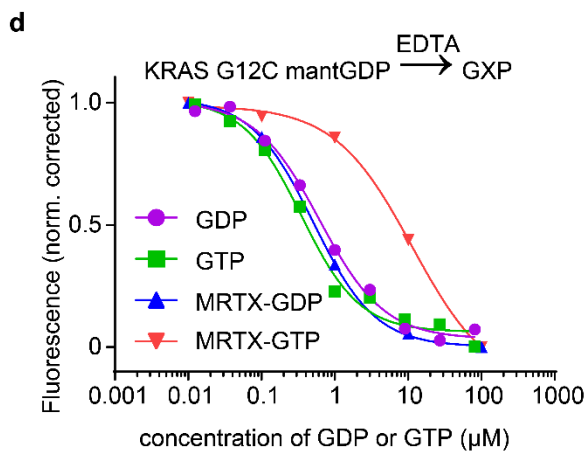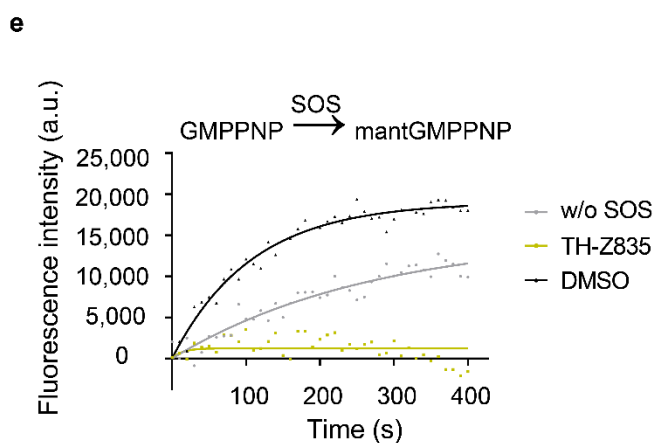

61 **Fig. S4: Further analysis of the binding mode of GMPPNP-bound KRAS.** **a** Computational modeling indicates our  
62 G12D inhibitor (PDB ID: 7EW9) does not have steric clash with the  $\gamma$ -phosphate of GMPPNP (PDB ID: 5USJ). The  
63 distance between the  $\gamma$ -phosphate of GMPPNP (PDB ID: 5USJ) and the acryloyl moiety of the G12C inhibitor MRTX  
64 (PDB ID: 6USX) is 1.5 Å. The distance between the  $\gamma$ -phosphate of GMPPNP and the piperazine moiety of the G12D  
65 inhibitor TH-Z816 (PDB ID: 7EW9) is 4.7 Å. The protein structure was modeled using the Protein Preparation Wizard  
66 of Schrödinger Maestro. **b** ITC assay of each compound with GMPPNP-bound KRAS(G12D). **c** ITC  $K_D$  values for  
67 each compound for both GMPPNP-bound and GDP-bound KRAS(G12D). The dashed line is a linear fitting line ( $y =$   
68  $x$ ). **d** EDTA-mediated competition between fluorescently labeled mantGDP loaded on KRAS and free nucleotide (GDP  
69 or GTP). The experiment was carried out with KRAS(G12C) alone (1  $\mu$ M) or with KRAS(G12C) treated with MRTX (3  
70  $\mu$ M). **e** Inhibitory activity of TH-Z835 measured by SOS-catalyzed nucleotide exchange assays with mantGMPPNP as  
71 the incoming nucleotide.

[TH-Z827] 800  $\mu$ M

[KRAS]

GDP-bound  
WT 15.6  $\mu$ M

GMPPNP-bound  
WT 14.0  $\mu$ M

GDP-bound  
G12C 28.7  $\mu$ M

GMPPNP-bound  
G12C 29.2  $\mu$ M

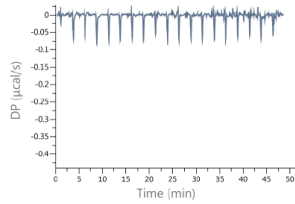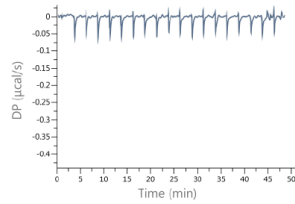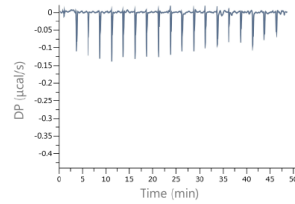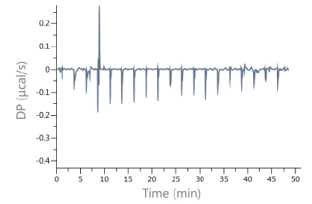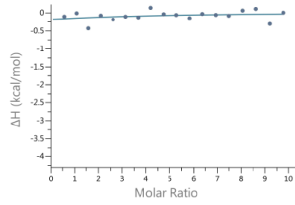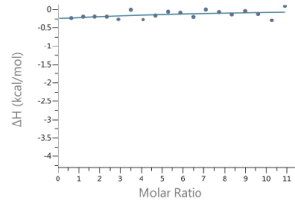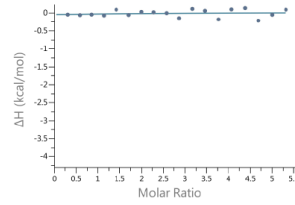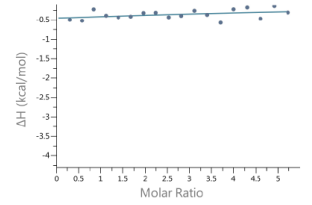

88

89

**Fig. S5: Binding assay of TH-Z827 with GDP- or GMPPNP-bound KRAS (WT or G12C).** ITC assays of TH-Z827

90

(800  $\mu$ M) and GDP- or GMPPNP-bound KRAS (WT or G12C).

91



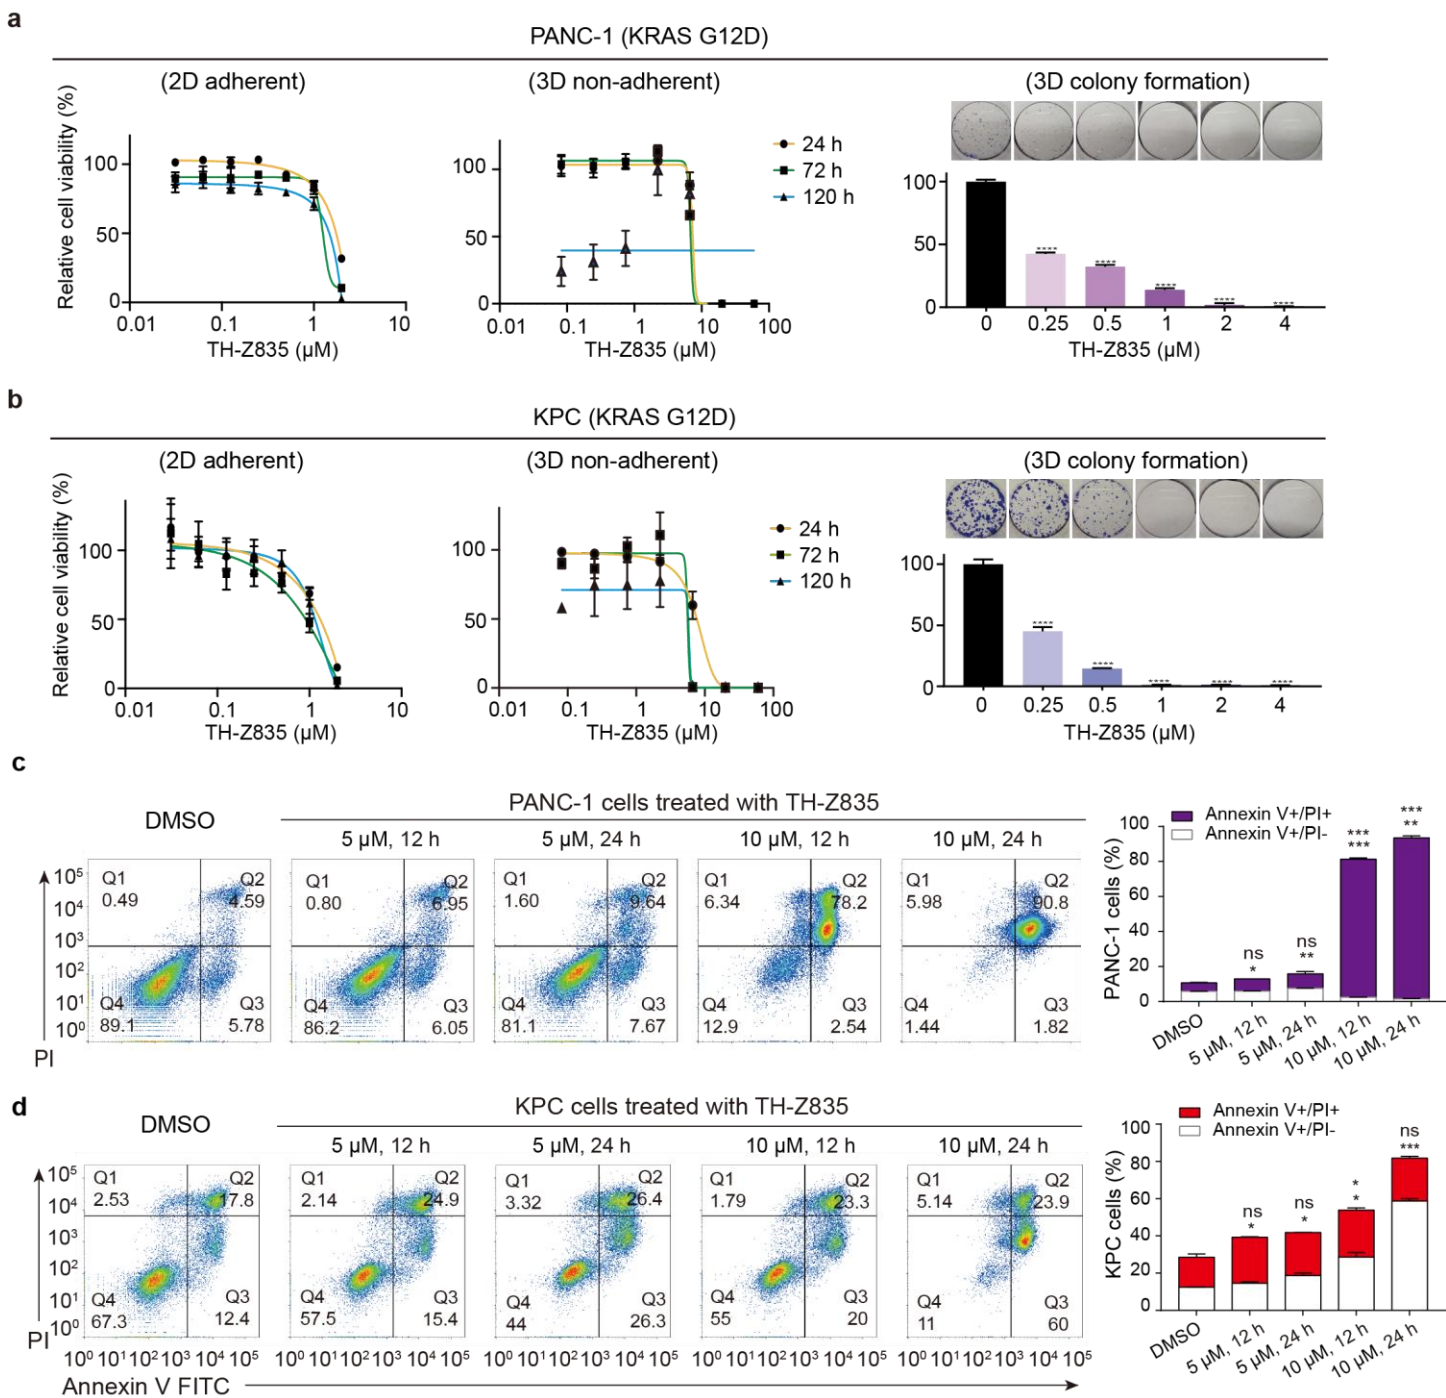

**Fig. S6: Anti-proliferative effects and signaling inhibition of KRAS(G12D) inhibitors.** **a, b** Cell viability assays of PANC-1 (**a**) and KPC (**b**) cells treated with indicated concentration of TH-Z835 for 24 h, 72h, or 120 h in 2D adherent assays (left panel) and 3D non-adherent assays plates (middle panel). As for colony formation assay (right panel), PANC-1 cells were cultured for 14 days and KPC cells were cultured for 10 days. Data are shown as means ± SEM ( $n = 3$ ), two-tailed Student's  $t$ -test, \*\*\*\*  $P < 0.001$ .

99 PANC-1 (c) or KPC (d) cells upon a 12-h or 24-h treatment with TH-Z835 (5  $\mu$ M or 10  $\mu$ M). Right panel: apoptotic  
 100 (Annexin V-positive) cell proportions were quantified. Data are show as means  $\pm$  SEM ( $n = 3$ ), two-tailed Student's t-  
 101 test, \*  $P < 0.05$ , \*\*  $P < 0.01$ , \*\*\*  $P < 0.001$ .

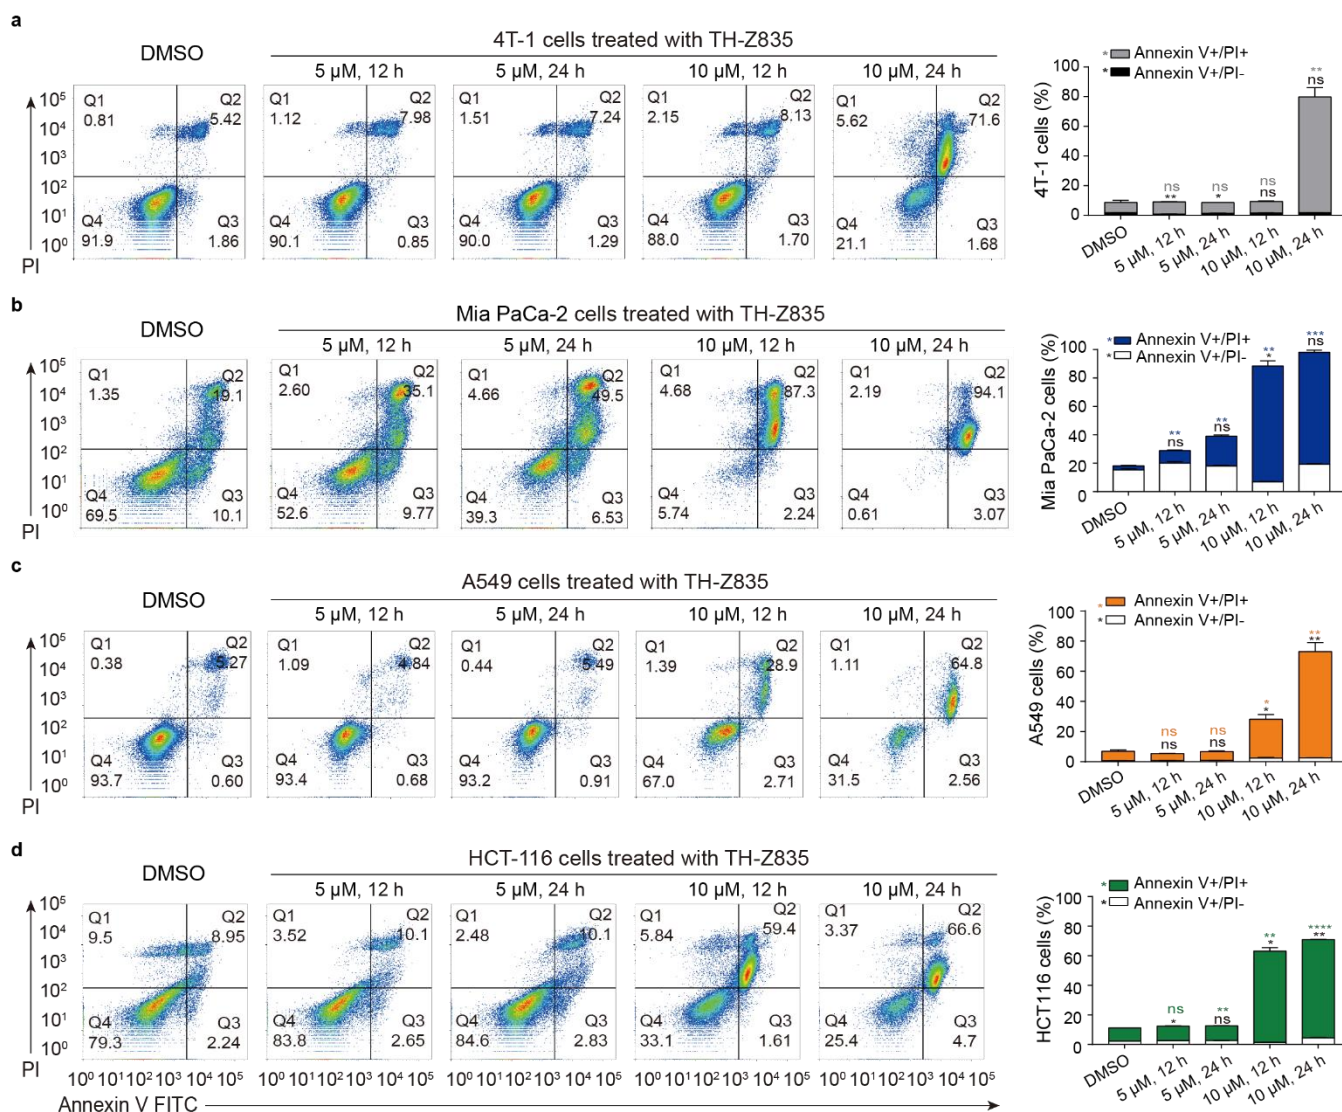

103

104 **Fig. S7: TH-Z835 induces apoptosis in different KRAS mutant cells.**

105 Left panel: apoptosis analysis by flow cytometry of 4T1 (a), MIA PaCa-2 (b), A549 (c), and HCT116 (d) cells upon a  
 106 12-h or 24-h treatment of TH-Z835. Right panel: Apoptotic (Annexin V-positive) cell proportions were quantified. Data  
 107 are shown as the means  $\pm$  SEM ( $n = 3$ ), two-tailed Student's t-test, \*  $P < 0.05$ , \*\*  $P < 0.01$ , \*\*\*  $P < 0.001$ , \*\*\*\*  $P <$   
 108 0.0001.

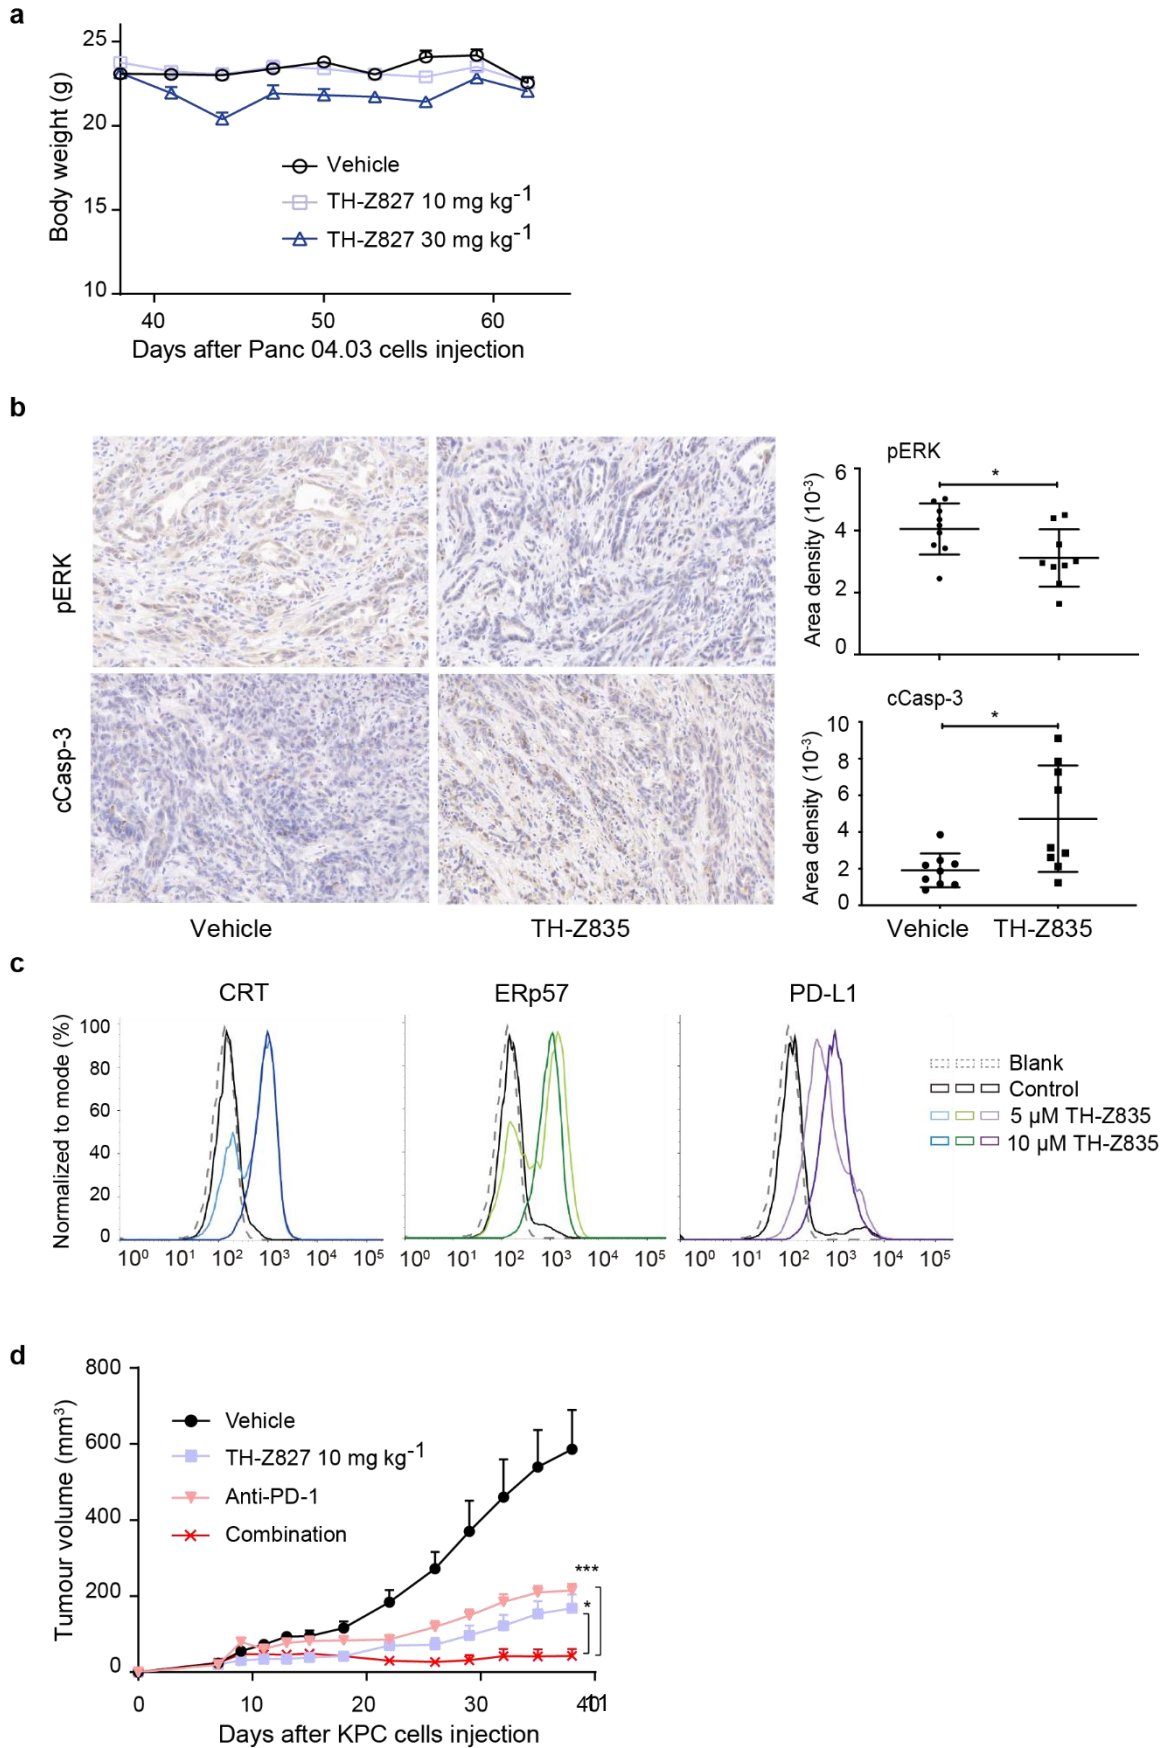

110 **Fig. S8: Anti-tumor effects of the KRAS (G12D) inhibitors alone and in combination with anti-PD-1 antibody**

111 **a** Body weight (means  $\pm$  SEM,  $n = 10$ ) of mice bearing xenograft tumors (from inoculation of Panc 04.03 cells) treated  
112 intraperitoneally with TH-Z827 at 10 mg kg<sup>-1</sup> or 30 mg kg<sup>-1</sup>. **b** Left panel: Immunohistochemical (IHC) analysis of pERK  
113 and cleaved Caspase-3 in tumor section. Scale bar, 20  $\mu$ m. Right panel: Quantifications of IHC positive staining  
114 (means  $\pm$  SEM,  $n = 9$ ) were analyzed using two-tailed Student's *t*-test, \*  $P < 0.05$ . **c** Flow cytometry analysis of PD-  
115 L1 and immunogenic cell death (ICD) markers (CRT and ERp57) on the surface of KPC cells after 24-h treatment with  
116 TH-Z835. **d** C57BL/6 mice were injected with KPC cells at Day 0, after which TH-Z827, anti-PD-1 antibody, or a  
117 combination therapy (10 mg kg<sup>-1</sup> TH-Z827 and 100  $\mu$ g per dose anti-PD-1 antibody) was IP administered using the  
118 same dosage schedule shown in **Fig. 7f**. Combination treatment ( $n = 5$ , shown as the mean  $\pm$  SEM) led to a statistically  
119 significant decrease in tumour volumes at day 38 compared with either single-agent treatment (one-way ANOVA  
120 followed by Dunnett's test; \*  $P_{\text{adj}} < 0.05$ , \*\*\*  $P_{\text{adj}} < 0.001$ ).

121
